# Supplementary material
Source: publisher figshare collection journal article supplement (https://frontiersin.figshare.com/ndownloader/files/26060363)

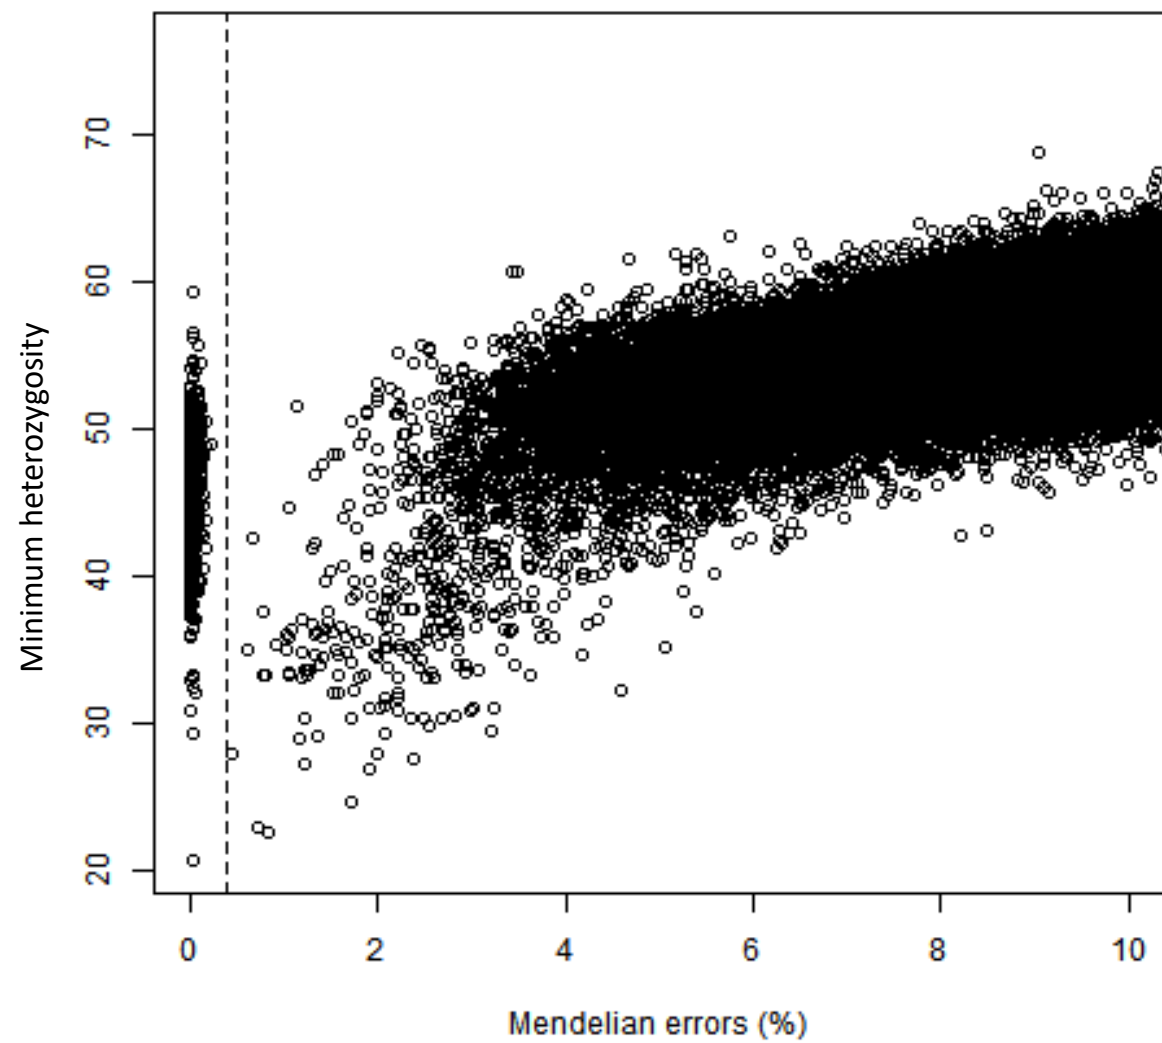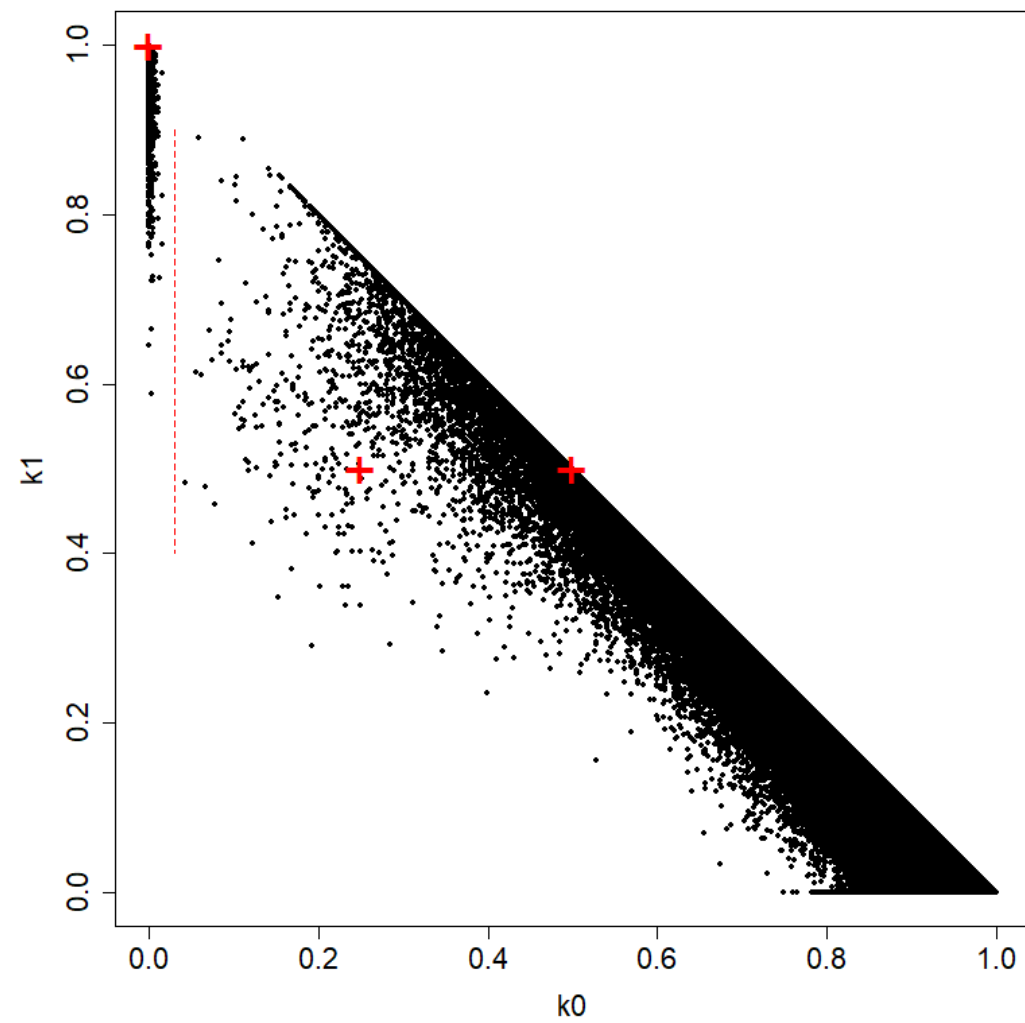

Supplement: Supplementary file 1 [file 26060363]

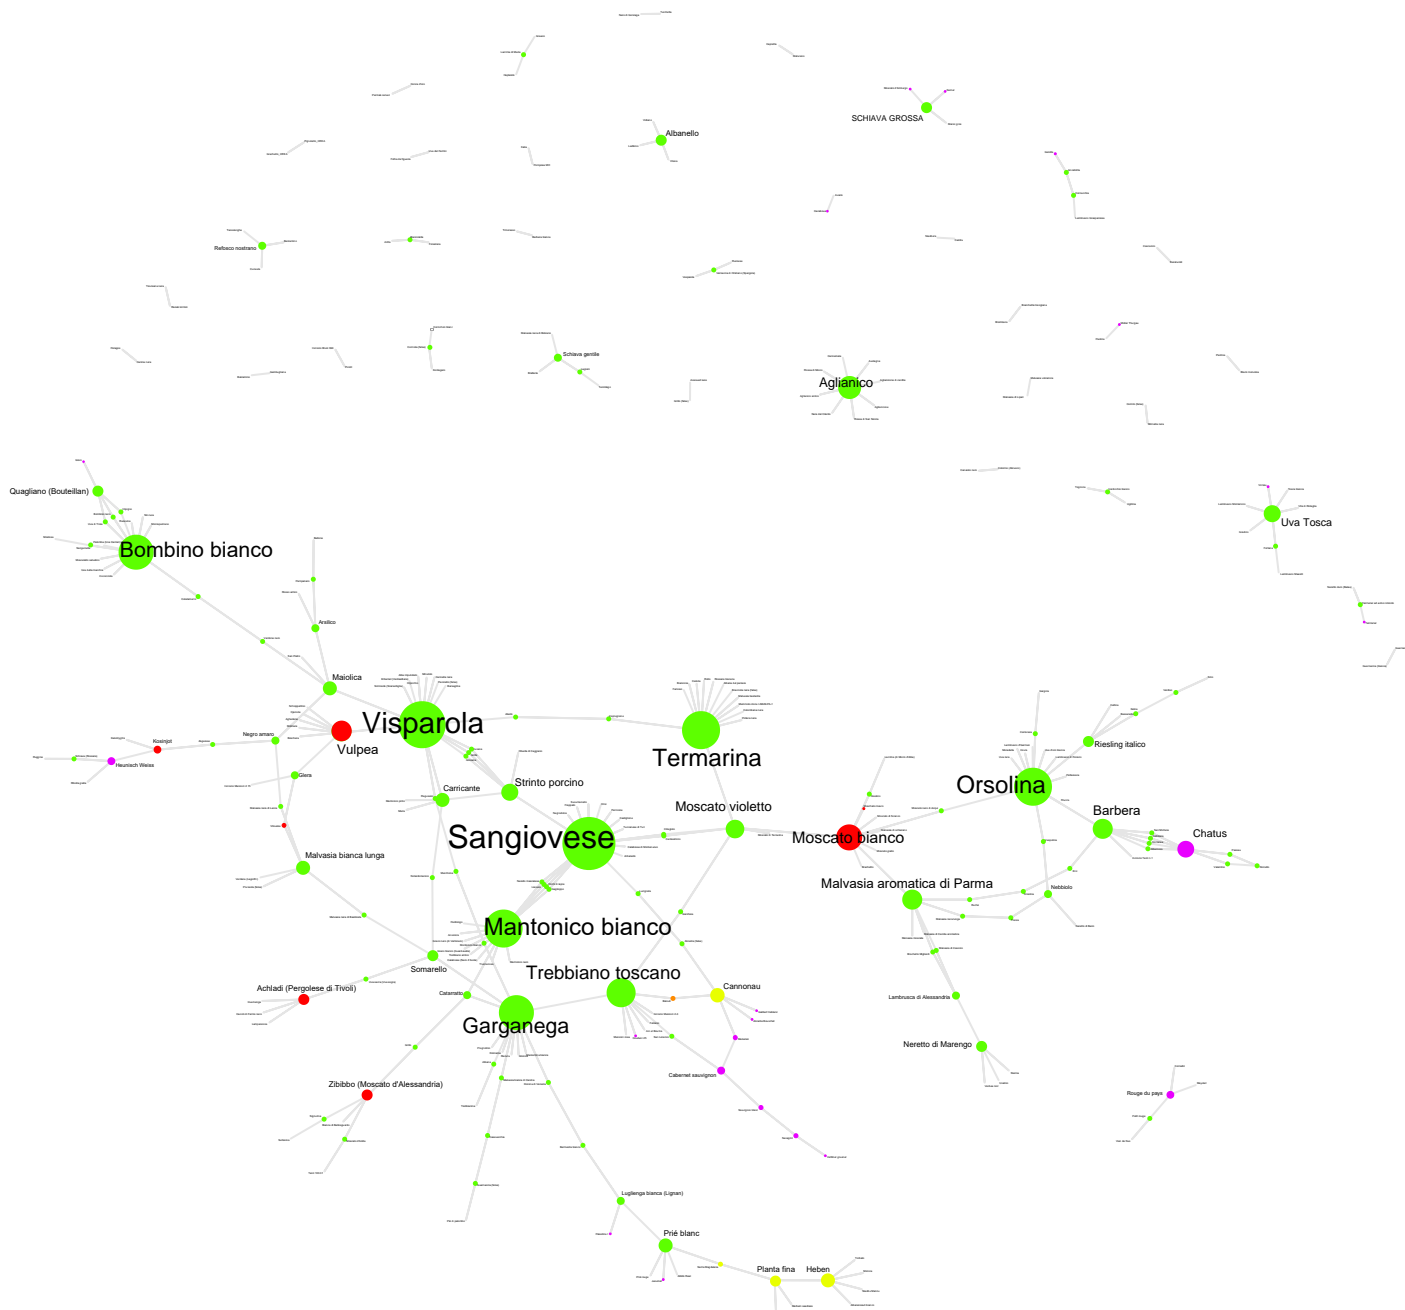

Supplement: Supplementary file 2 [file 26060363]

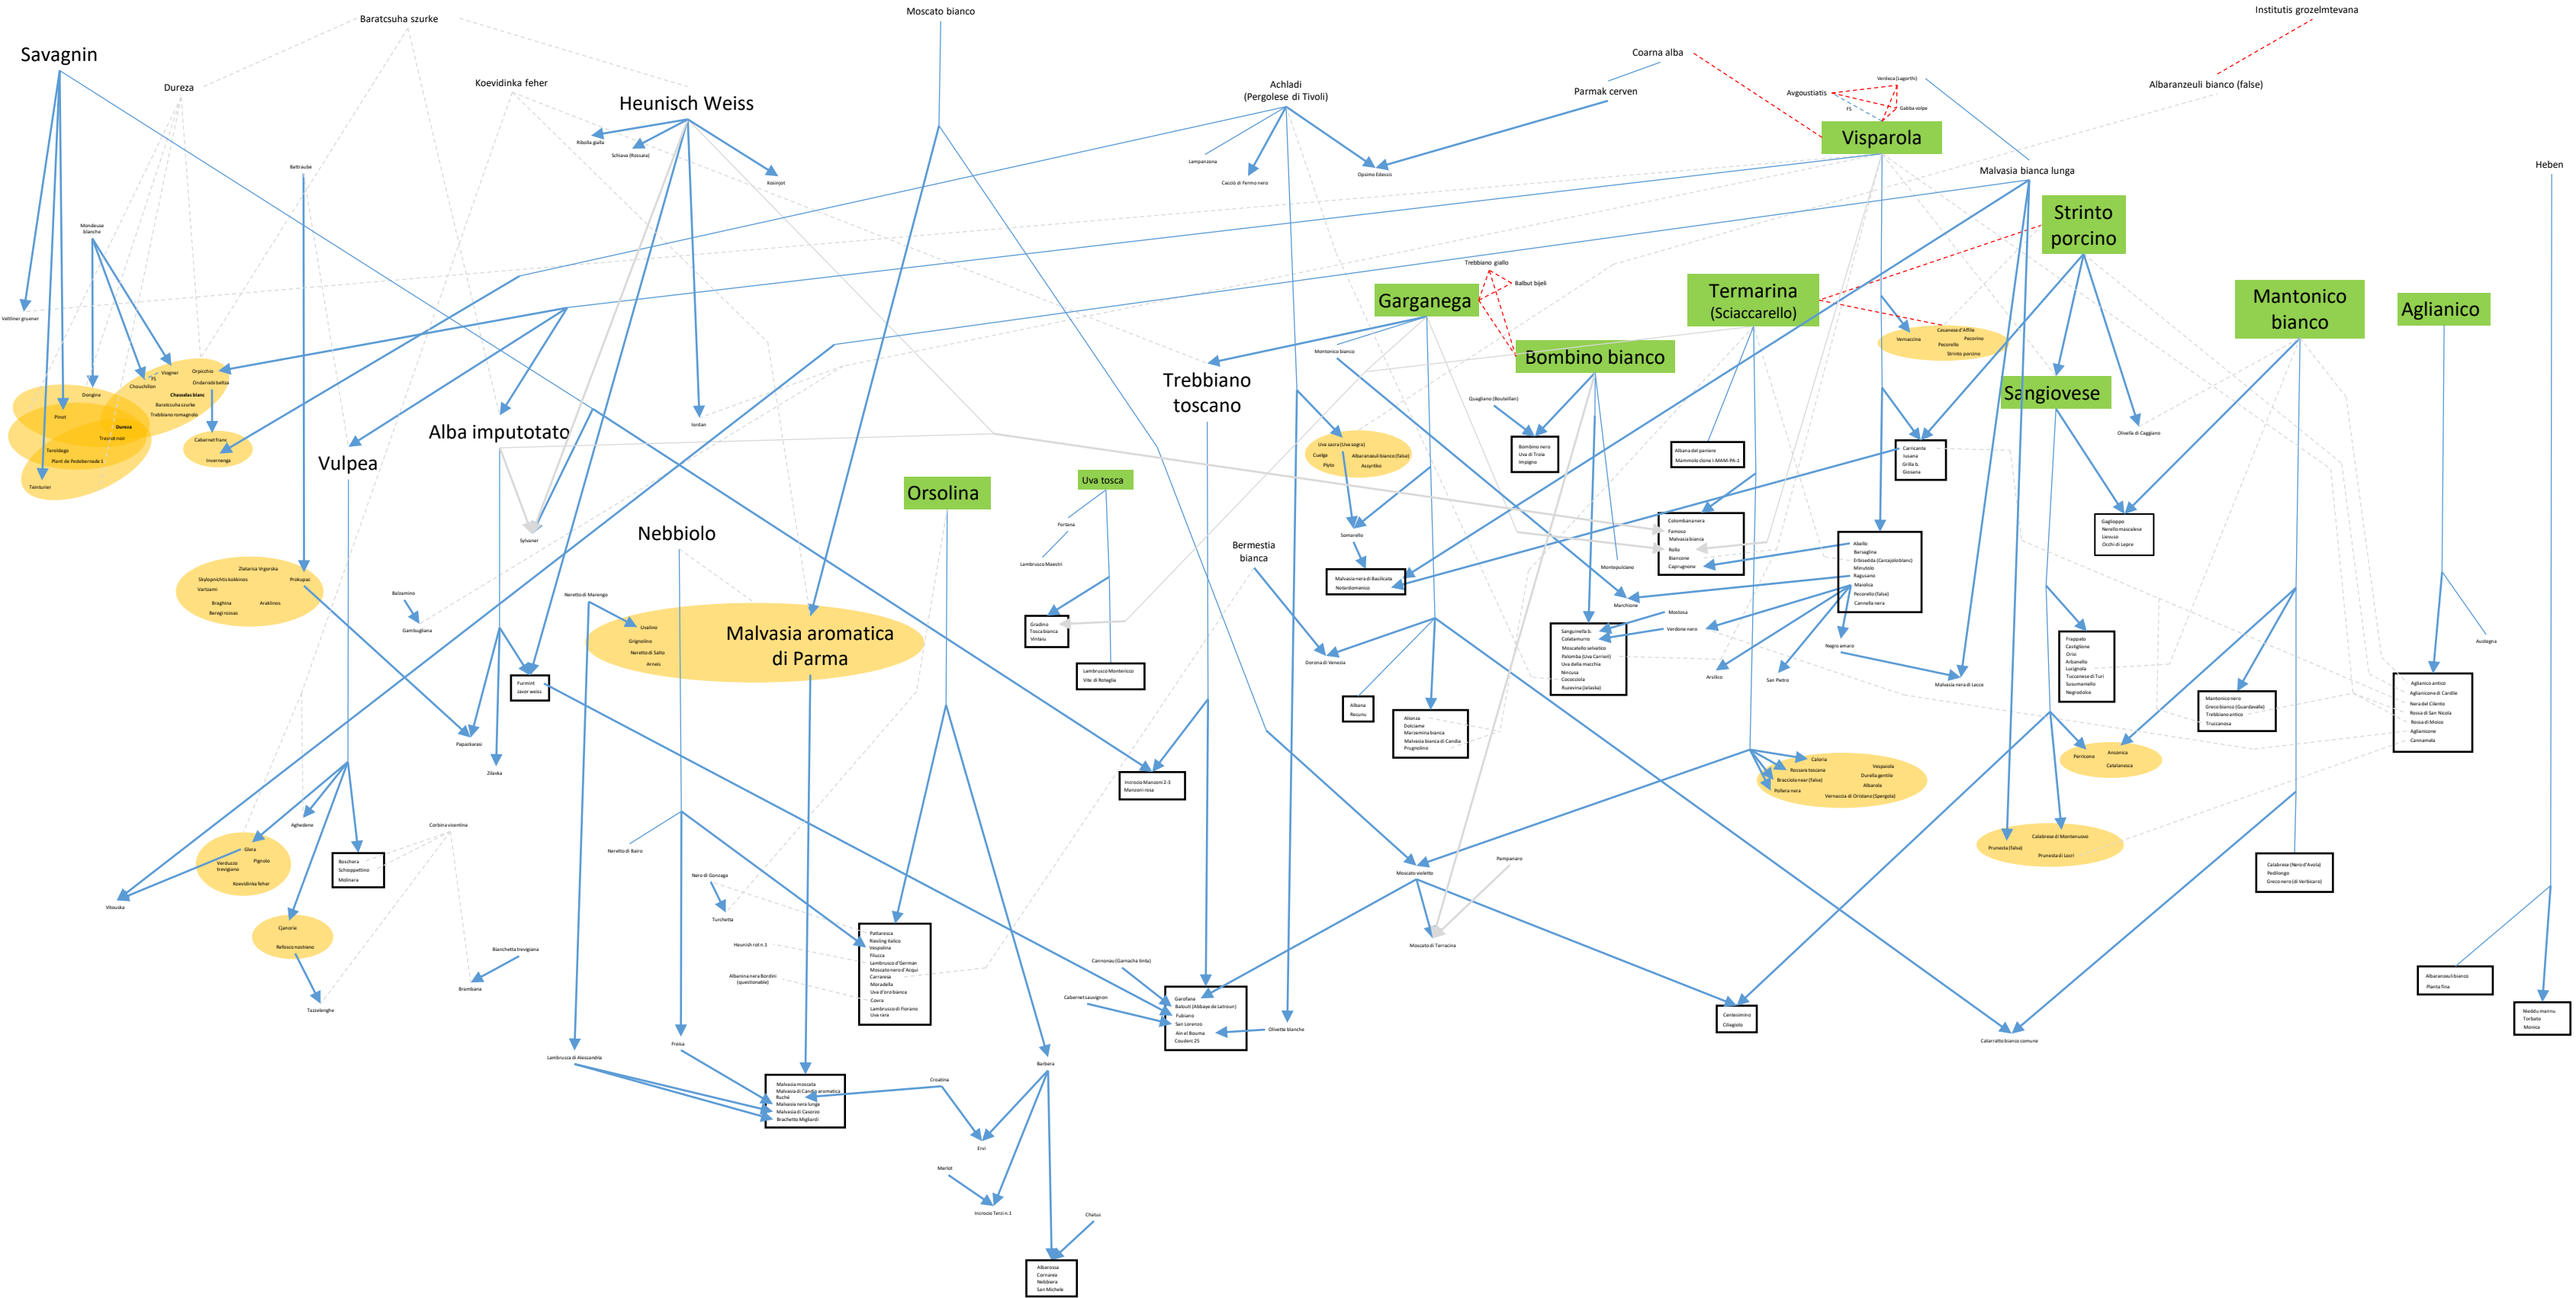

Supplement: Supplementary file 3 [file 26060363]
